# Supplementary material for: Effect of Vegetation Carryover and Climate Variability on the Seasonal Growth of Vegetation in the Upper and Middle Reaches of the Yellow River Basin
Source: MDPI journal article supplement (doi:10.3390/rs14195011), 2022-10-09
Supplement: s1 [file s1]

Archive with 1 entries (1 files):
- remotesensing-1905775-supplementary.pdf
